# Supplementary material
Source: MDPI journal article supplement (https://www.mdpi.com/2072-4292/14/3/708)

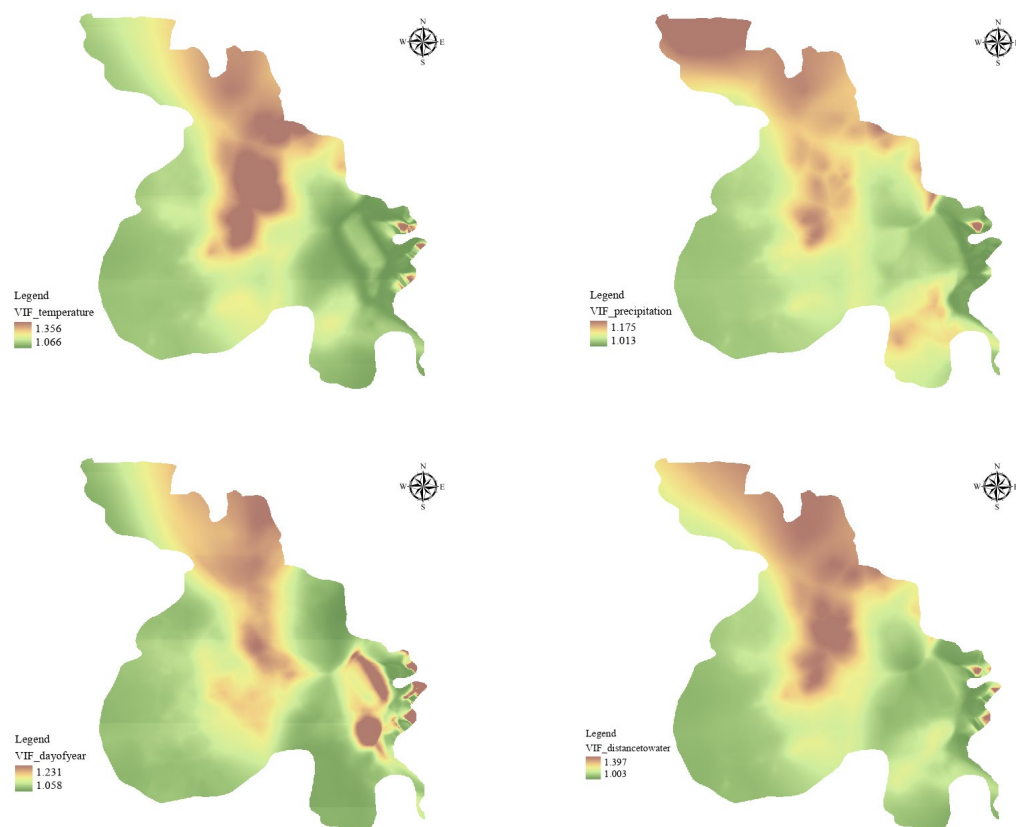

**Figure S1.** VIF results for predictor variables.

Supplement: s1 [file s1]
